# Supplementary material
Source: publisher site journal article supplement (http://study.sagepub.com/sites/default/files/appendix_1a_digit_span_tasks.docx)
Supplement: Supplementary file 1 [file appendix_1a_digit_span_tasks.docx]

Appendix 1A: Digit Span Tasks

| 4 7 | 6 2 | 8 3 | 1 9 |
| --- | --- | --- | --- |
| 2 7 3 | 1 8 4 | 8 3 0 | 5 1 4 |
| 4 9 2 0 | 3 8 6 1 | 2 7 5 4 | 1 9 0 6 |
| 5 1 6 9 7 | 3 8 5 1 7 | 9 5 3 6 2 | 2 8 4 6 0 |
| 6 1 8 9 4 7 | 5 7 3 9 8 4 | 8 1 9 4 2 6 | 7 0 4 5 3 2 |
| 3 5 7 2 9 1 4 | 9 2 6 4 3 1 8 | 6 1 7 9 5 2 3 | 4 0 7 8 9 1 5 |
